# Supplementary material for: TiO2 spatially confined growth of Sb2(S,Se)3@TiO2 NT heterojunction photoanodes and their photoelectrochemical properties
Source: Royal Society of Chemistry journal article supplement (doi:10.1039/d3cy01136d), 2023-01-01
Supplement: d3cy01136d1.pdf [file d3cy01136d1.pdf]

# Supporting information

## **TiO<sub>2</sub> spatially confined growth of Sb<sub>2</sub>(S,Se)<sub>3</sub>@TiO<sub>2</sub> NTs heterojunction photoanodes and their photoelectrochemical properties**

**Wei Jin<sup>a</sup>, Dekang Liu<sup>a</sup>, Liyuan Zhang<sup>a</sup>, Qian Sun<sup>a</sup>, Yishan Wang<sup>b</sup>, Enzhou Liu<sup>c</sup>,  
Xiaoyun Hu<sup>a</sup>, Hui Miao<sup>a, \*</sup>**

<sup>a</sup> School of Physics, Northwest University, Xi'an, 710127, PR China

<sup>b</sup> State Key Laboratory of Transient Optics and Photonics, Chinese Academy of  
Sciences, Xi'an, 710119, PR China

<sup>c</sup> School of Chemical Engineering, Northwest University, Xi'an, 710069, PR China

\* Corresponding author

E-mail address: huim@nwu.edu.cn (H. Miao)

### **1. Supplemental Figures**

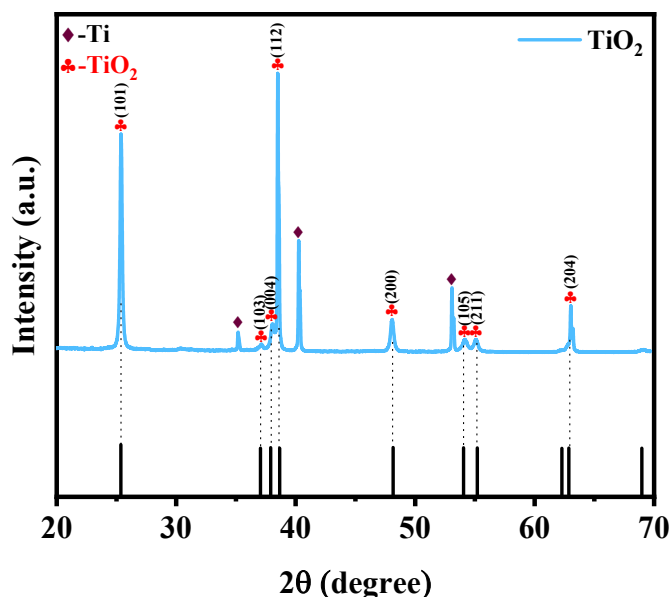

**Fig. S1.** The XRD diagram of monomeTiO<sub>2</sub>.

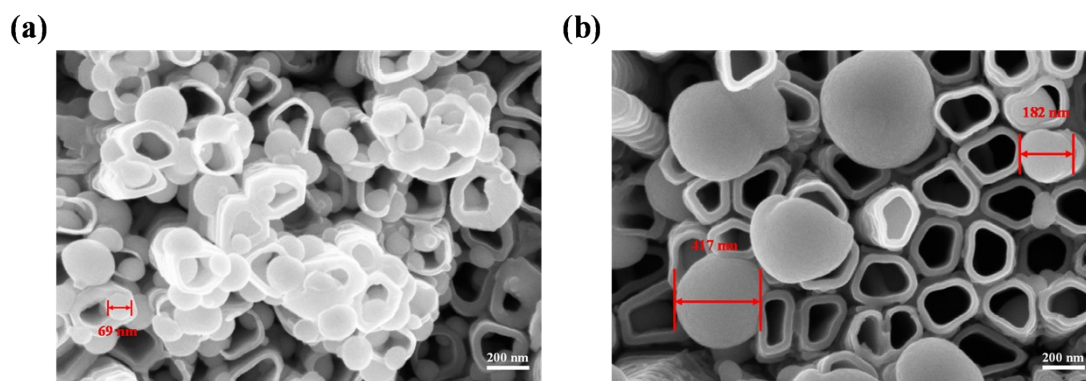

**Fig. S2.** (a) SEM image of  $\text{Sb}_2(\text{S,Se})_3@\text{TiO}_2$  at low concentrations of Se, (b) SEM image of  $\text{Sb}_2(\text{S,Se})_3@\text{TiO}_2$  at high concentrations of Se.

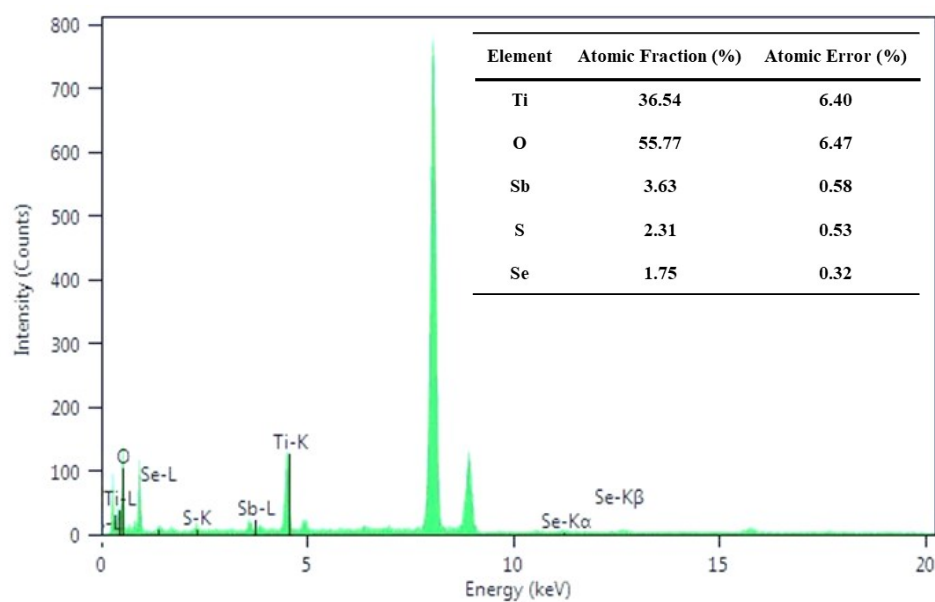

**Fig. S3.** EDS spectrum of  $\text{Sb}_2(\text{S,Se})_3@\text{TiO}_2$ .

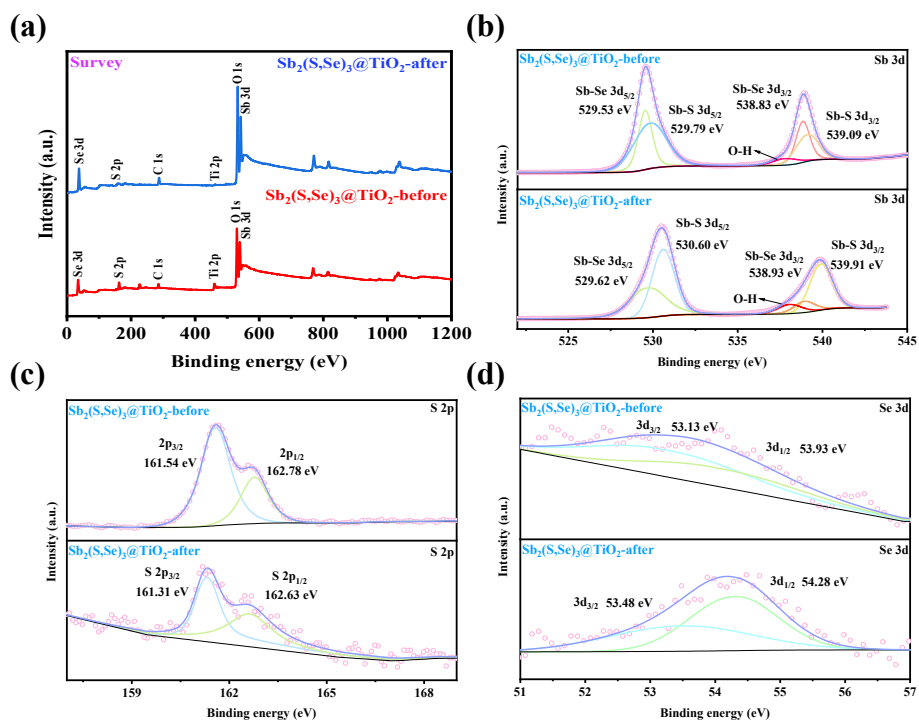

**Fig. S4.** (a) XPS survey spectrum, (b) Sb 3d, (c) S 2p and (d) Se 3d high-resolution XPS spectra for  $\text{Sb}_2(\text{S,Se})_3@\text{TiO}_2$  photoanodes before and after test.

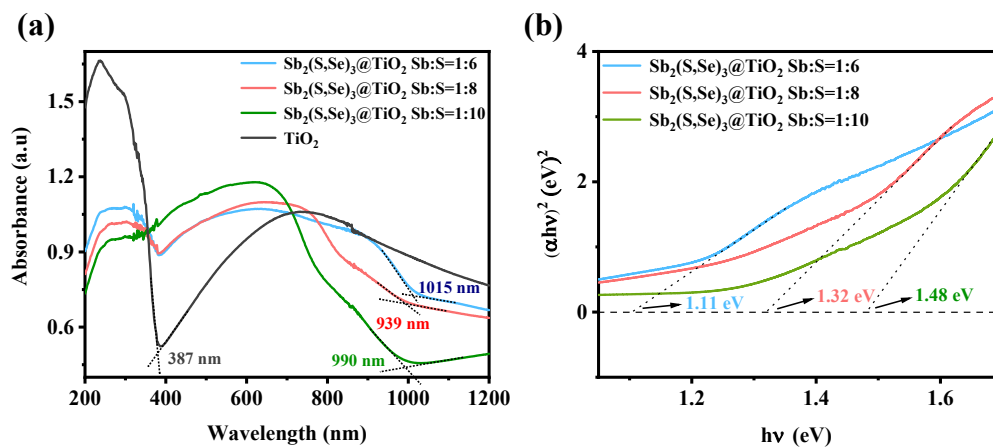

**Fig. S5.** (a) UV-vis-NIR spectra of  $\text{Sb}_2(\text{S,Se})_3@\text{TiO}_2$  at different S concentrations, (b) Semiconductor band gap of  $\text{Sb}_2(\text{S,Se})_3@\text{TiO}_2$  at different S concentrations.

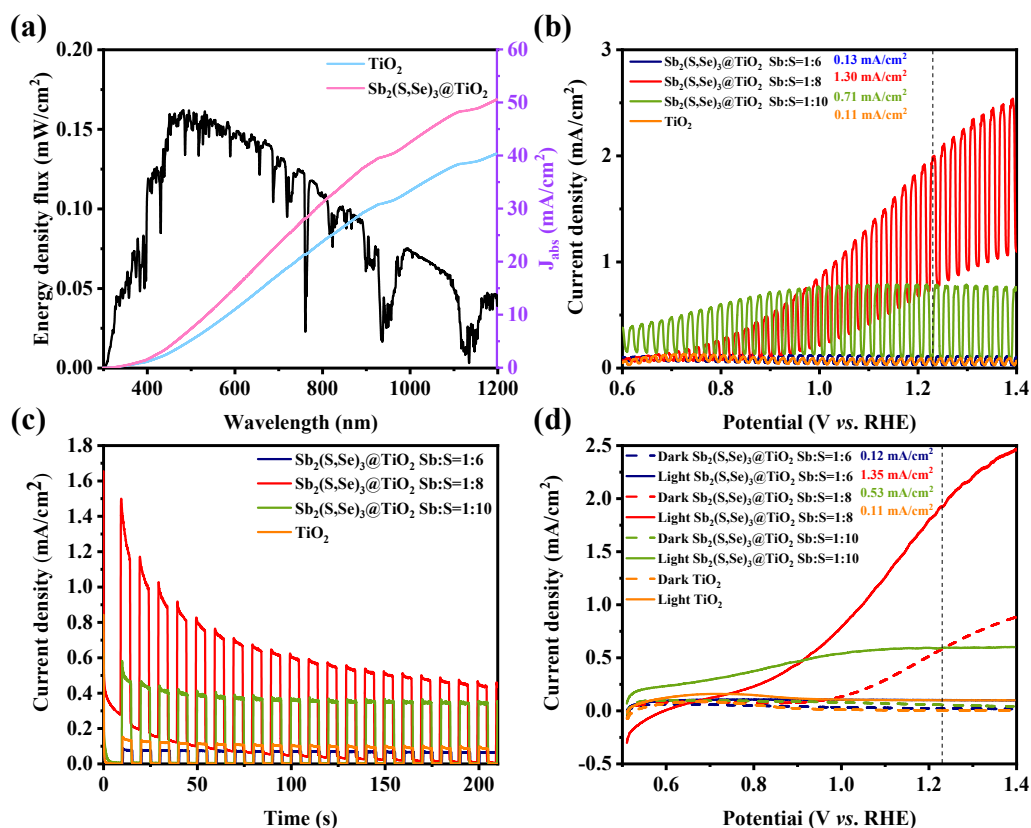

**Fig. S6.** (a) The current density fluxes and integrated current densities ( $J_{\text{abs}}$ ) of monomers  $\text{TiO}_2$  and  $\text{Sb}_2(\text{S,Se})_3/\text{TiO}_2$  heterojunctions were calculated, (b) J-V curves of  $\text{TiO}_2$  NTs of the different samples, (c) J-t curves of  $\text{TiO}_2$  NTs of the different samples, (d) LSV curves under full on or full off light.

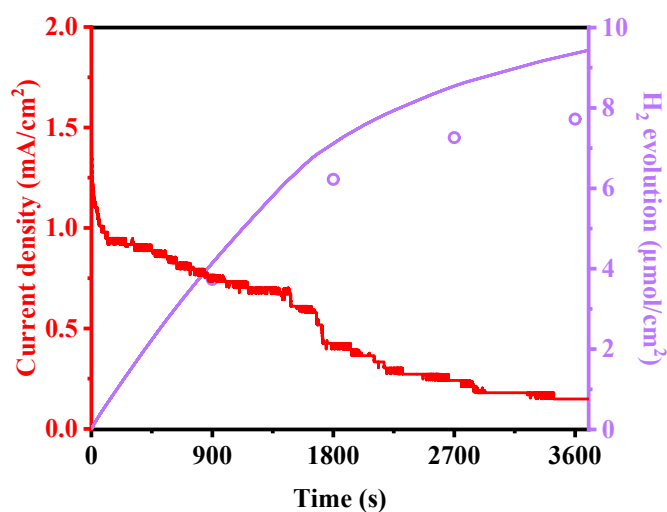

**Fig. S7.**  $\text{H}_2$  evolution curve and the concurrent J-t curve of  $\text{Sb}_2(\text{S,Se})_3/\text{TiO}_2$  at 1.23 V vs. RHE in 0.5 M  $\text{Na}_2\text{SO}_4$  under AM 1.5G illumination.

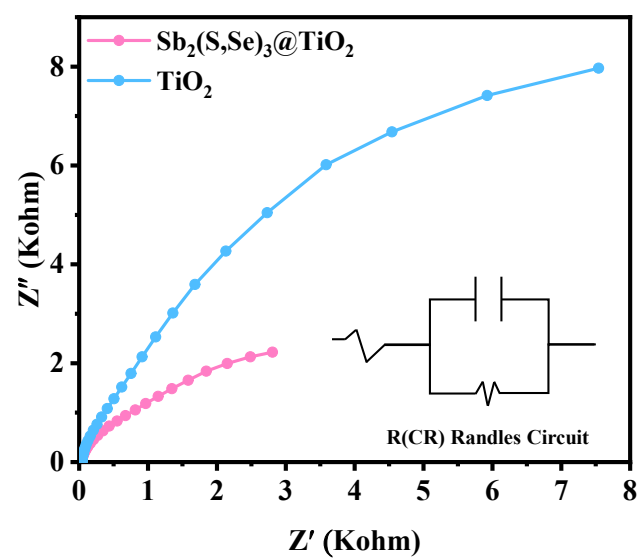

**Fig. S8.** Nyquist plots (EIS) under AM 1.5G illumination, the equivalent circuit model is shown in the illustration for data fitting.

## 2. The formula used in this work

The theoretical photocurrent density ( $J_{abs}$ ) of the photocathode can be obtained by using the following equations:

$$\eta_{abs} = (1 - 10^{-A}) \times 100\% \quad (S1)$$

$$I_{abs} = \frac{q}{hc} \int \lambda \phi_{\lambda} \eta_{abs} d\lambda \quad (S2)$$

Here,  $J_{abs}$  is expressed as the theoretical photocurrent density,  $q$  is the charge of the electron,  $h$  is Planck's constant,  $c$  is the speed of light,  $\phi_{\lambda}$  is the photon flux in the AM 1.5 G solar spectrum, and  $\eta_{abs}$  is the light absorption efficiency,  $A$  is photo absorbance.

### Absorbed Photocurrent Efficiency

The IPCE values of  $\text{TiO}_2$  and  $\text{Sb}_2(\text{S,Se})_3/\text{TiO}_2$  were calculated according to the following Eq. (S3):

$$IPCE = \frac{1240 J_{\lambda}}{P \lambda} \times 100\% \quad (S3)$$

In the formula,  $J_{\lambda}$  was the photocurrent density ( $\text{mA}/\text{cm}^2$ ) under monochromatic illumination at a certain wavelength,  $\lambda$  was the wavelength of the incident light (nm), and  $P$  was the optical power of monochromatic light with a certain wavelength ( $\text{mW}/\text{cm}^2$ ), which could be measured by an optical power meter.

The APCE values of  $\text{TiO}_2$  and  $\text{Sb}_2(\text{S,Se})_3/\text{TiO}_2$  were calculated according to the following Eq. (S4):

$$APCE = \frac{IPCE(\lambda)}{1 - 10^{-A(\lambda)}} \quad (S4)$$

where  $A(\lambda)$  was the absorbance of material at different wavelengths.

### Applied Bias Photocurrent Efficiency

The ABPE values of  $\text{TiO}_2$  and  $\text{Sb}_2(\text{S,Se})_3/\text{TiO}_2$  were calculated according to the following Eq. (S5):

$$ABPE = \frac{J \times (1.23 - E_{app})}{I_0} \quad (S5)$$

where  $\eta$  was the conversion efficiency,  $J$  was the photocurrent density ( $\text{mA}/\text{cm}^2$ ) obtained by using linear sweep voltammetry plots,  $E_{app}$  was the applied bias voltage (V), and  $I_0$  was the incident

light irradiance (mW/cm<sup>2</sup>).

#### Fill factor

The FF values of TiO<sub>2</sub> and Sb<sub>2</sub>(S,Se)<sub>3</sub>@TiO<sub>2</sub> were calculated according to the following Eq. (S6).

$$FF = \frac{J_{max} \times V_{max}}{J_{sc} \times V_{oc}} \quad \#(S6)$$

#### Faradaic efficiency

All hydrogen production experiments were performed in the solution of neutral 0.5 M Na<sub>2</sub>SO<sub>4</sub> electrolyte under AM 1.5G illumination and collected by gas chromatograph. The area of the working electrode was 4 cm<sup>2</sup>. The faradaic efficiency of Sb<sub>2</sub>(S,Se)<sub>3</sub>@TiO<sub>2</sub> heterojunction could be calculated by the following formula:

$$\eta = \frac{zFn}{Q} \quad \#(S7)$$

Here, z was the number of electrons transferred per mole of gas (4 for O<sub>2</sub> and 2 for H<sub>2</sub>); F was the Faraday constant (F=96485 C/mol); n was Moles of H<sub>2</sub> produced (mol); Q was the total number of photogenerated charges passing through (C).
